# Supplementary material for: Gold nanoparticles supported on zirconium, tin and ruthenium oxides for reagentless electrochemical sensing of hydrogen peroxide
Source: Royal Society of Chemistry journal article supplement (doi:10.1039/c5ay00446b), 2015-01-01
Supplement: c5ay00446b1.pdf [file c5ay00446b1.pdf]

## Supplementary

### Gold nanoparticles supported on zirconium, tin and ruthenium oxides for reagentless electrochemical sensing of hydrogen peroxide

Fig. S1A. CV behaviors of RuO<sub>2</sub>-AuNP (curve a, b), ZrO<sub>2</sub>-AuNP (curve c, d) and SnO<sub>2</sub>-AuNP (curve e, f) modified GCEs in PBS measured at a scan rate 5 mVs<sup>-1</sup>

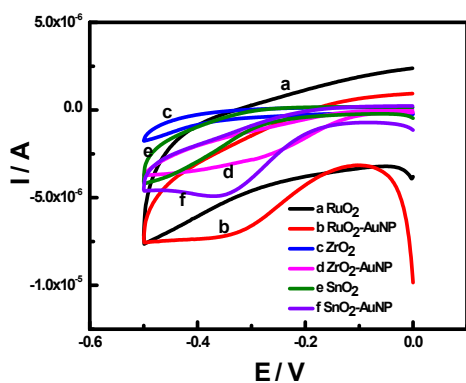

Fig. S1B. CV behaviors of RuO<sub>2</sub>-AuNP (curve a, b), ZrO<sub>2</sub>-AuNP (curve c, d) and SnO<sub>2</sub>-AuNP (curve e, f) modified GCEs in NaOH measured at a scan rate 5 mVs<sup>-1</sup>

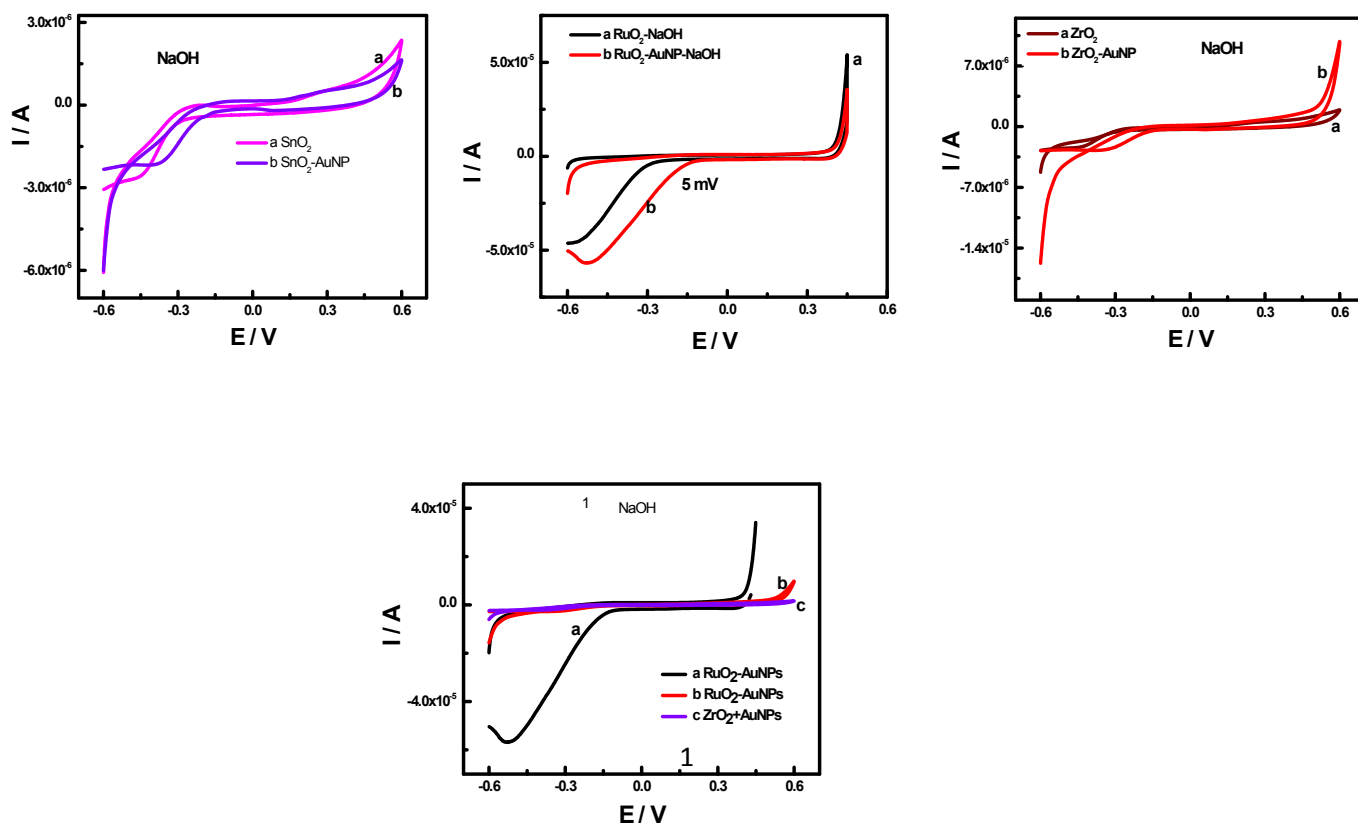

Fig. S1C. current versus pH plots (A) RuO<sub>2</sub>-AuNP , (B) ZrO<sub>2</sub>-AuNP and (C) SnO<sub>2</sub>-AuNP modified GCEs. (D). Effect of AuNP deposition time on the H<sub>2</sub>O<sub>2</sub> detection on the RuO<sub>2</sub> surface

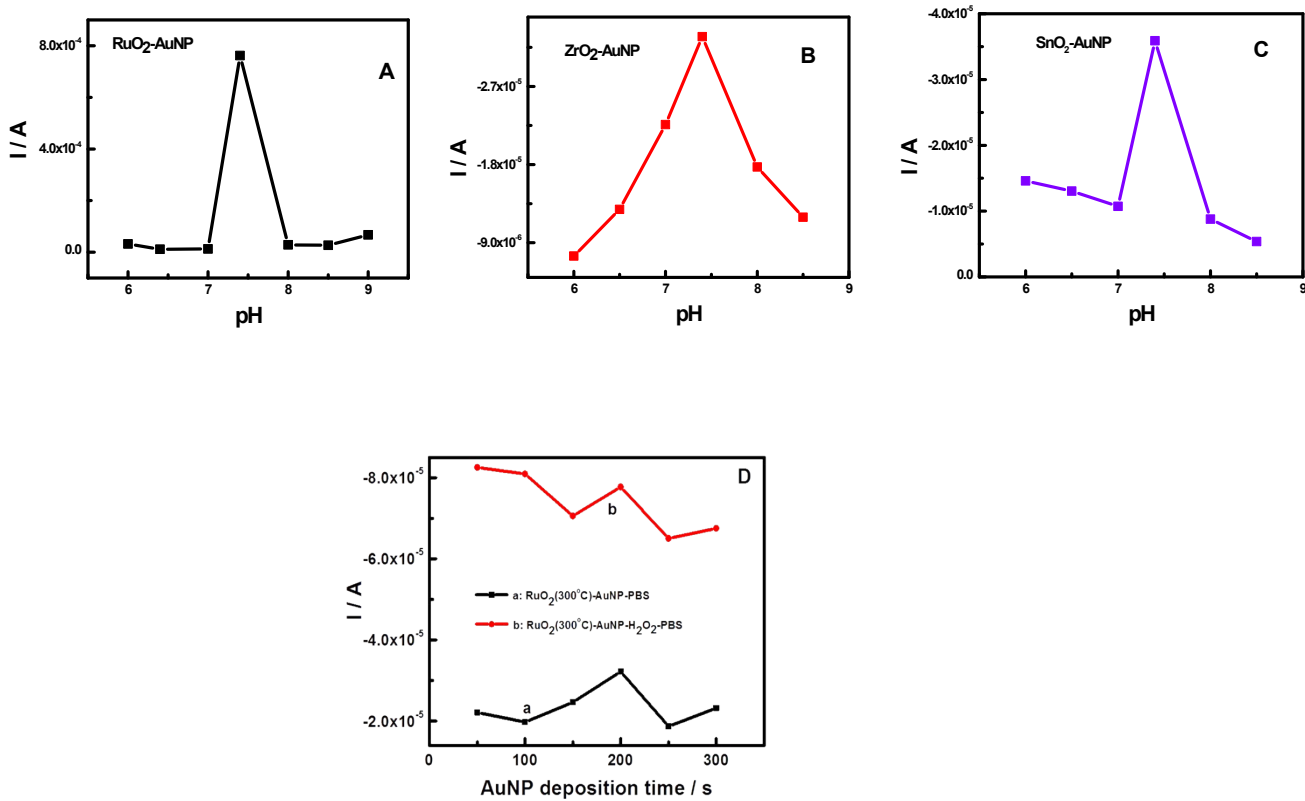

Fig. S2. UV – visible spectra of RuO<sub>2</sub> (curve a) , RuO<sub>2</sub>-AuNP (curve b), ZrO<sub>2</sub> (curve a), ZrO<sub>2</sub>-AuNP (curve b) SnO<sub>2</sub> (curve a) and SnO<sub>2</sub>-AuNP (Curve b)

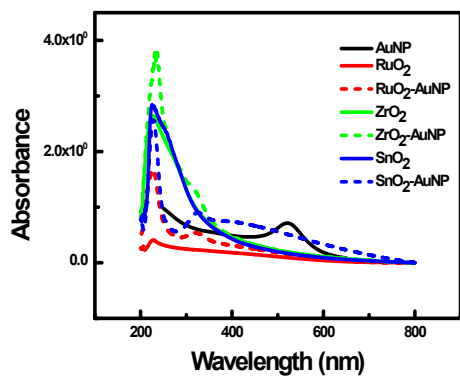

| Material               | Band gap (eV) |
|------------------------|---------------|
| RuO <sub>2</sub>       | 2.69          |
| RuO <sub>2</sub> -AuNP | 2.78          |
| ZrO <sub>2</sub>       | 4.24          |
| ZrO <sub>2</sub> -AuNP | 3.14          |
| SnO <sub>2</sub>       | 3.01          |
| SnO <sub>2</sub> -AuNP | 2.88          |

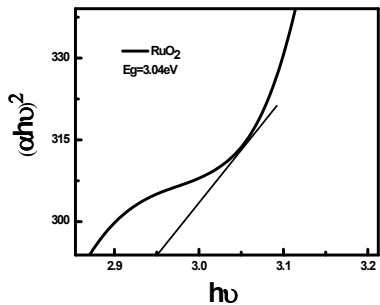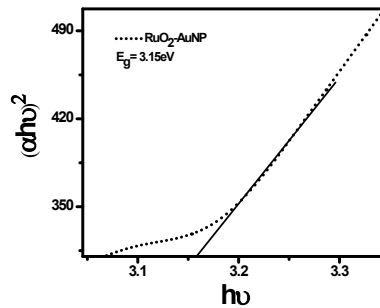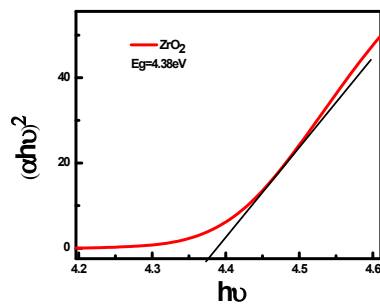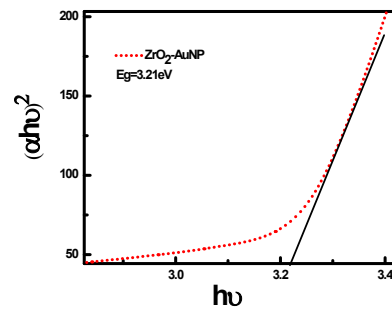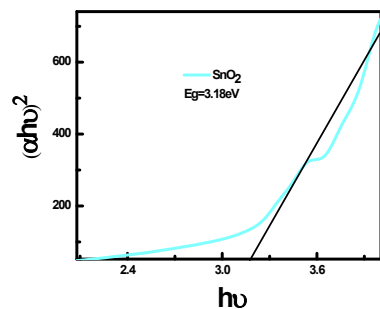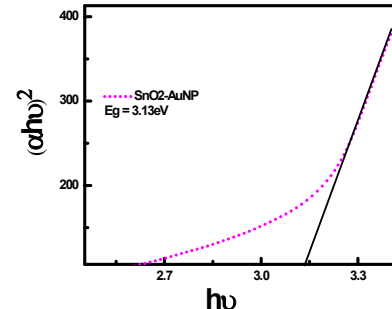

Fig. S3. CV behaviors of RuO<sub>2</sub>-AuNP (curve a,b), ZrO<sub>2</sub>-AuNP (curve c,d), SnO<sub>2</sub>-AuNP (curve e,f), modified GCEs in presence of 0.1 mM [Ru(NH<sub>3</sub>)<sub>6</sub>]<sup>3+</sup> in phosphate buffer measured at a scan rate 5 mVs<sup>-1</sup>. Solid lines indicate the CV behaviors in the absence (curves, a,c,e) and the dotted lines represent the CV behaviors (curves b, d, f) in the presence of 1 mM [Fe(CN)<sub>6</sub>]<sup>3-/4-</sup>. Inset : enlarged view of RuO<sub>2</sub> and RuO<sub>2</sub>-AuNP.

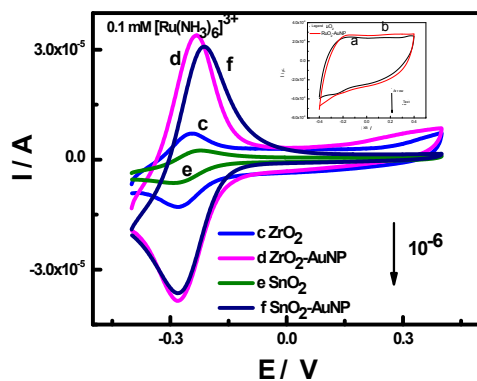

Fig.S4. FTIR spectra of RuO<sub>2</sub> (curve a), RuO<sub>2</sub>-AuNP (curve b), ZrO<sub>2</sub> (curve c), ZrO<sub>2</sub>-AuNP (curve d) SnO<sub>2</sub> (curve e) and SnO<sub>2</sub>-AuNP (Curve f)

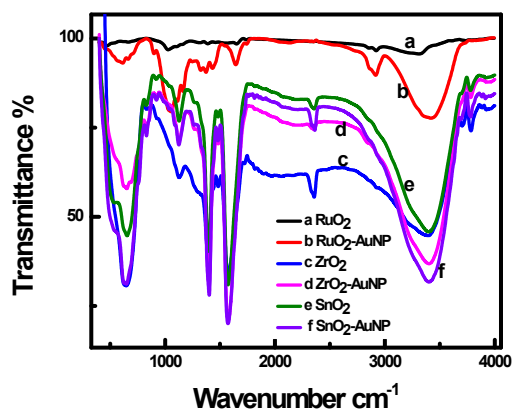

Table S1. XRD parameters for RuO<sub>2</sub>, ZrO<sub>2</sub>, SnO<sub>2</sub> and RuO<sub>2</sub>-AuNP, ZrO<sub>2</sub>-AuNP and SnO<sub>2</sub>-AuNP

| RuO <sub>2</sub> | RuO <sub>2</sub> -AuNP | ZrO <sub>2</sub>  | ZrO <sub>2</sub> -AuNP | SnO <sub>2</sub>  | SnO <sub>2</sub> -AuNP |
|------------------|------------------------|-------------------|------------------------|-------------------|------------------------|
| -                | 27.8 <b>(1 10)</b>     | 24.1 <b>(110)</b> | 25.2 <b>(320)</b>      | 26.3 <b>(110)</b> | 26.3 <b>(110)</b>      |
| -                | 35.02 <b>(101)</b>     | 25.2 <b>(320)</b> | 28.09 <b>(020)</b>     | 33.6 <b>(101)</b> | 33.7 <b>(101)</b>      |
| -                | 54.7 <b>(211)</b>      | 27.9 <b>(020)</b> | 30.06 <b>(011)</b>     | 37.8 <b>(200)</b> | 37.8 <b>(200)</b>      |
|                  |                        | 30.6 <b>(011)</b> | 31.4 <b>(120)</b>      | 51.5 <b>(211)</b> | 51.7 <b>(211)</b>      |
|                  |                        | 31.3 <b>(120)</b> | 50.1 <b>(031)</b>      | 64.6 <b>(112)</b> | 57.8 <b>(002)</b>      |
|                  |                        | 35.1 <b>(101)</b> | 54.0 <b>(131)</b>      |                   | 64.6 <b>(112)</b>      |
|                  |                        | 50.4 <b>(031)</b> |                        |                   |                        |
|                  |                        | 55.2 <b>(131)</b> |                        |                   |                        |
|                  |                        | 62.9 <b>(022)</b> |                        |                   |                        |

| Composite              | Particle size / nm |
|------------------------|--------------------|
| RuO <sub>2</sub>       | 7.4                |
| RuO <sub>2</sub> -AuNP | 42.8               |
| ZrO <sub>2</sub>       | 49                 |
| ZrO <sub>2</sub> -AuNP | 60                 |
| SnO <sub>2</sub>       | 23                 |
| SnO <sub>2</sub> -AuNP | 27                 |

Fig. S5. EIS behaviors of RuO<sub>2</sub>-AuNP (curve a, b), ZrO<sub>2</sub>-AuNP (curve c, d) and SnO<sub>2</sub>-AuNP (curve e, f) modified GCEs in absence (curves, a, c, e) and presence of 1 mM H<sub>2</sub>O<sub>2</sub> (curves b, d, f) in phosphate buffer measured in the frequency range 100 kHz to 1 Hz at an applied potential -400 mV and amplitude 5 mV. While solid lines indicate EIS behaviors in the absence (curves, a,c,e) in the presence of 1 mM H<sub>2</sub>O<sub>2</sub> (curves b, d, f). Circles are the [R(QR)(QR)W] equivalent circuit fit data.

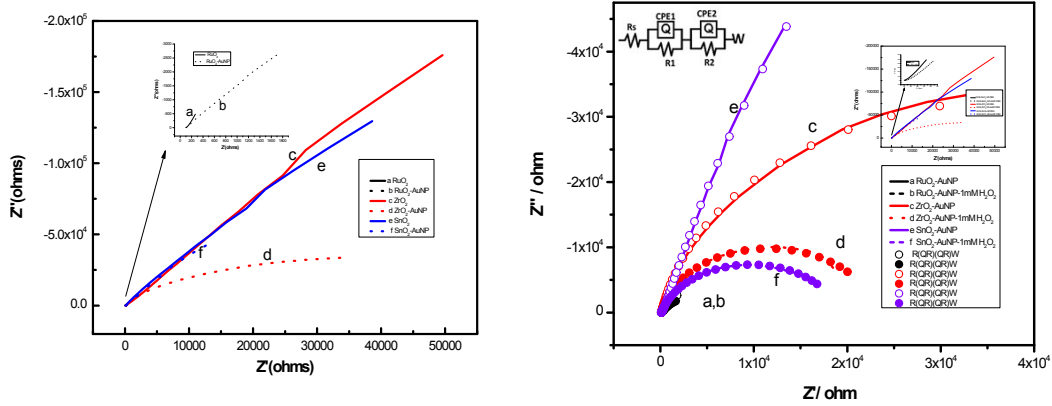

Table S2. Impedance parameters obtained for all three metal oxides in the absence and presence of AuNP fabricated in nafion film in the absence and presence of 1 mM H<sub>2</sub>O<sub>2</sub> in phosphate buffer. The circuit used is [R(QR)(QR)W].

| Surfaces                                                 | R <sub>s</sub> (Ωcm <sup>-2</sup> ) | Q <sub>CPE1</sub> (Fcm <sup>-2</sup> ) | n1     | R1(Ωcm <sup>-2</sup> ) | Q <sub>CPE2</sub> (Fcm <sup>-2</sup> ) | n2     | R2 (Ω cm <sup>-2</sup> ) | W (Ω s <sup>-1/2</sup> ) | χ <sup>2</sup>        |
|----------------------------------------------------------|-------------------------------------|----------------------------------------|--------|------------------------|----------------------------------------|--------|--------------------------|--------------------------|-----------------------|
| RuO <sub>2</sub>                                         | 52.500                              | 4.14×10 <sup>-4</sup>                  | 1.00   | 1.98×10 <sup>3</sup>   | 9.45×10 <sup>-9</sup>                  | 0.98   | 1.96×10 <sup>2</sup>     | 2.50×10 <sup>-4</sup>    | 3.08×10 <sup>-4</sup> |
| RuO <sub>2</sub> -1mM H <sub>2</sub> O <sub>2</sub>      | 100.0                               | 1.57×10 <sup>-7</sup>                  | 0.68   | 1.12×10 <sup>3</sup>   | 4.89×10 <sup>-4</sup>                  | 1.00   | 1.32×10 <sup>2</sup>     | 1.86×10 <sup>-4</sup>    | 4.90×10 <sup>-4</sup> |
| RuO <sub>2</sub> -AuNP                                   | 0.011                               | 2.23×10 <sup>-6</sup>                  | 0.48   | 1.08×10 <sup>2</sup>   | 8.25×10 <sup>-5</sup>                  | 0.74   | 1.72×10 <sup>4</sup>     | 1.29×10 <sup>-4</sup>    | 2.48×10 <sup>-4</sup> |
| RuO <sub>2</sub> -AuNP-1mM H <sub>2</sub> O <sub>2</sub> | 0.080                               | 1.22×10 <sup>-4</sup>                  | 0.78   | 4.38×10 <sup>3</sup>   | 6.14×10 <sup>-6</sup>                  | 0.35   | 1.20×10 <sup>2</sup>     | 5.53×10 <sup>-4</sup>    | 2.44×10 <sup>-4</sup> |
| ZrO <sub>2</sub>                                         | 23.78                               | 1.055×10 <sup>-8</sup>                 | 1      | 1.16×10 <sup>2</sup>   | 1.226×10 <sup>-6</sup>                 | 0.8314 | 4.9×10 <sup>15</sup>     | 0.000975                 | 3.5×10 <sup>-4</sup>  |
| ZrO <sub>2</sub> -1mM H <sub>2</sub> O <sub>2</sub>      | 0.01337                             | 1.324×10 <sup>-6</sup>                 | 0.8461 | 7.181×10 <sup>6</sup>  | 3.869×10 <sup>-8</sup>                 | 0.8293 | 132.1                    | 1.085×10 <sup>11</sup>   | 1.80×10 <sup>-4</sup> |
| ZrO <sub>2</sub> -AuNP                                   | 0.007587                            | 2.735×10 <sup>-6</sup>                 | 0.899  | 7.64×10 <sup>4</sup>   | 1.354×10 <sup>-6</sup>                 | 0.5963 | 117.6                    | 1.43×10 <sup>9</sup>     | 3.35×10 <sup>-4</sup> |
| ZrO <sub>2</sub> -AuNP-1mM H <sub>2</sub> O <sub>2</sub> | 0.005672                            | 6.406×10 <sup>-7</sup>                 | 0.6435 | 119.8                  | 2.736×10 <sup>-6</sup>                 | 0.9023 | 2.25×10 <sup>4</sup>     | 0.00106                  | 3.17×10 <sup>-4</sup> |
| SnO <sub>2</sub>                                         | 32.9                                | 1.433×10 <sup>-6</sup>                 | 0.868  | 1.283×10 <sup>6</sup>  | 2.144×10 <sup>-8</sup>                 | 0.9561 | 74.08                    | 2.029×10 <sup>8</sup>    | 2.03×10 <sup>-4</sup> |
| SnO <sub>2</sub> -1mM H <sub>2</sub> O <sub>2</sub>      | 22.54                               | 3.013×10 <sup>-8</sup>                 | 0.9043 | 90.58                  | 1.388×10 <sup>-6</sup>                 | 0.8727 | 3.821×10 <sup>5</sup>    | 3.284×10 <sup>6</sup>    | 1.31×10 <sup>-4</sup> |
| SnO <sub>2</sub> -AuNP                                   | 0.03902                             | 3.19×10 <sup>-8</sup>                  | 0.8478 | 114.6                  | 4.321×10 <sup>-6</sup>                 | 0.9013 | 3.954×10 <sup>5</sup>    | 0.0001306                | 9.5×10 <sup>-5</sup>  |
| SnO <sub>2</sub> -AuNP-1mM H <sub>2</sub> O <sub>2</sub> | 0.001266                            | 3.3×10 <sup>-6</sup>                   | 0.8335 | 1.915×10 <sup>4</sup>  | 1.686×10 <sup>-7</sup>                 | 0.7239 | 124.2                    | 6.211×10 <sup>19</sup>   | 2.42×10 <sup>-4</sup> |



Fig. S6. (A) Comparative calibration curves of RuO<sub>2</sub>-AuNP, ZrO<sub>2</sub>-AuNP and SnO<sub>2</sub>-AuNP composites obtained for from chrono amperometry measurements made at -0.4 V for the successive addition of H<sub>2</sub>O<sub>2</sub>. Concentration range studied is 1×10<sup>-9</sup> to 30×10<sup>-3</sup> M.

(B) Comparative calibration curves of RuO<sub>2</sub> and RuO<sub>2</sub>-AuNP

(c) Comparative calibration curves of SnO<sub>2</sub> and SnO<sub>2</sub>-AuNP. Depicted for showing the superiority of metal oxide-AuNP over the lone metal oxide behavior

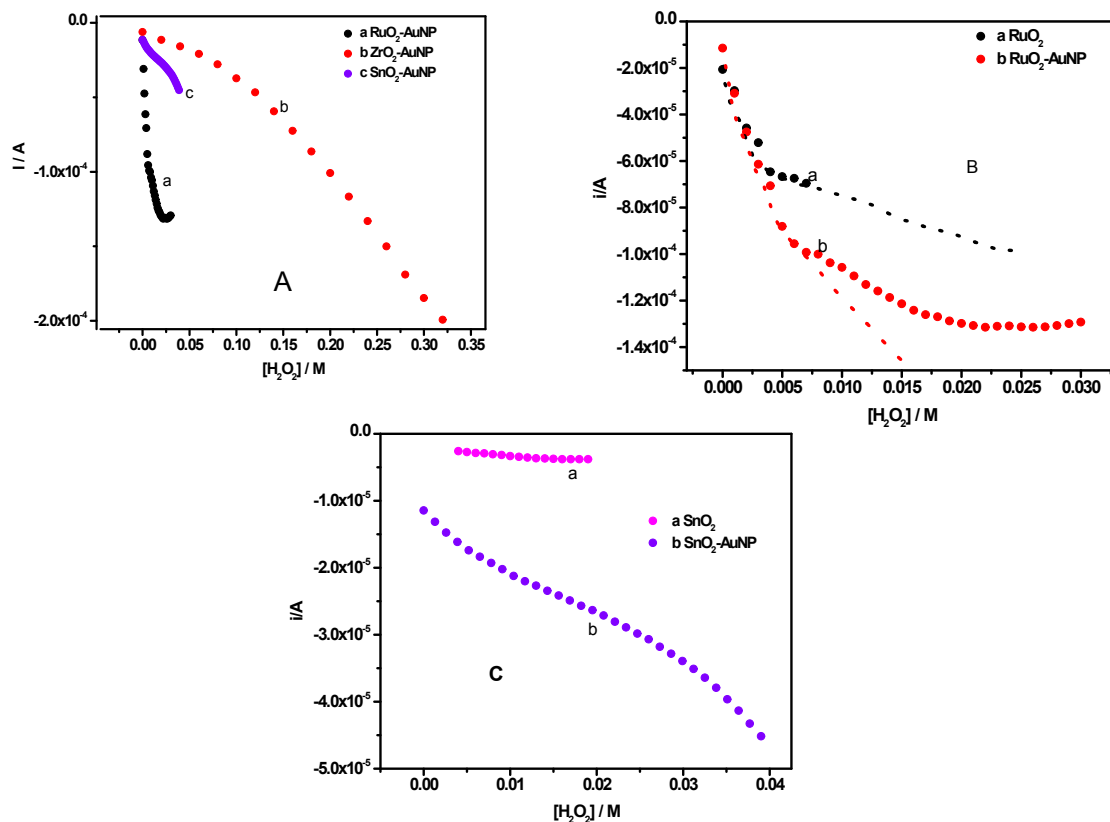

Fig. S7. CV behaviors of RuO<sub>2</sub>-AuNP (curve a,b), ZrO<sub>2</sub>-AuNP (curve c,d), SnO<sub>2</sub>-AuNP (curve e,f), modified GCEs in antiseptic (A) and commercial milk (B) in phosphate buffer measured at a scan rate 5 mVs<sup>-1</sup>. Solid lines indicate the CV behaviors in the absence (curves, a,c,e) and the dotted lines represent the CV behaviors (curves b, d, f) in presence of commercial samples

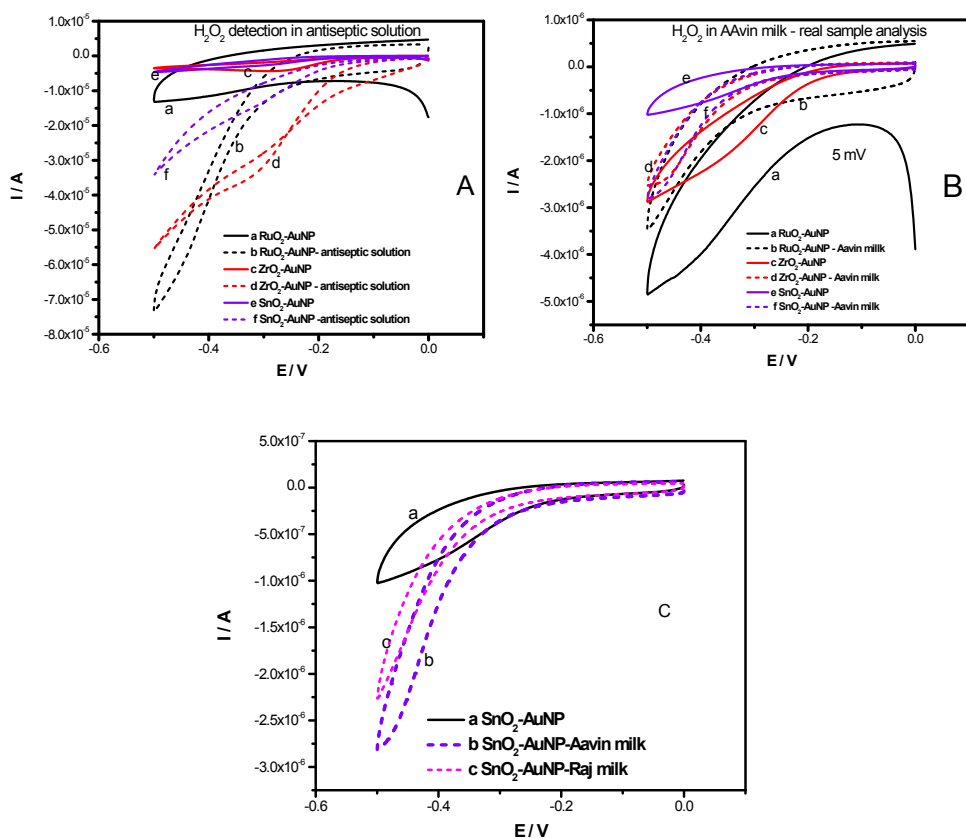

Table S3. Michealis-Menten kinetic parameters obtained for different metal oxide and metal oxide-AuNP used in this study for the reduction of H<sub>2</sub>O<sub>2</sub> in phosphate buffer

| Surfaces               | $K_m$ / M             | $K_c$ / s          | $\Gamma_t$ / moles cm <sup>-2</sup> |
|------------------------|-----------------------|--------------------|-------------------------------------|
| RuO <sub>2</sub>       | $2.12 \times 10^{-3}$ | $4.8 \times 10^4$  | $1.42 \times 10^{-13}$              |
| RuO <sub>2</sub> -AuNP | $10.1 \times 10^{-3}$ | $1.18 \times 10^8$ | $3.2 \times 10^{-17}$               |
| ZrO <sub>2</sub>       | $7.16 \times 10^{-5}$ | $8.47 \times 10^3$ | $1.38 \times 10^{-13}$              |
| ZrO <sub>2</sub> -AuNP | 1.48                  | $5.32 \times 10^6$ | $9.53 \times 10^{-15}$              |
| SnO <sub>2</sub>       | $3 \times 10^{-3}$    | $5.4 \times 10^3$  | $5.9 \times 10^{-14}$               |
| SnO <sub>2</sub> -AuNP | $2.3 \times 10^{-3}$  | $2.9 \times 10^5$  | $7.9 \times 10^{-15}$               |

Table S4. H<sub>2</sub>O<sub>2</sub> detection at different metal oxide /metal nanoparticle modified electrodes.

| Electrode materials                                                      | Linear range and LOD                                       | Effect of interferences with name                                | Real samples studied                        | Reference                                                    |
|--------------------------------------------------------------------------|------------------------------------------------------------|------------------------------------------------------------------|---------------------------------------------|--------------------------------------------------------------|
| AgNPs/ZnO/GCE                                                            | 2μM to 5.5mM                                               | Dopamine<br>Ascorbic acid,<br>Acetaminophen                      | --                                          | QiWang.Microchim Acta (2010)169:361-365                      |
| AgNPs-MWCNT/Au electrode                                                 | 0.05 to 17                                                 | AA,UA,                                                           | --                                          | W. Zhao Talanta 80 (2009) 1029.                              |
| CPE/MWCNT/ RuO <sub>2</sub>                                              | 0.5 to 50mM                                                | Glu,AA,UA                                                        | --                                          | Ramin M.A. Biosensors and Bioelectronics (2012)              |
| GCE/MnO <sub>2</sub> / Nafion                                            | 10.0×10 <sup>-6</sup> to 15.0×10 <sup>-5</sup>             | UA.Dopamine,L-cysteine,AA                                        | --                                          | Li Zhen,Zhen Fang, Int.J.Electrochem. Sci.,4(2009)407-413    |
| GC/MnO <sub>2</sub> /GO nano composite                                   | 5 to 600 μM                                                | Glu, citric acid,cu <sup>2+</sup>                                | ClassicalKMnO <sub>4</sub> titration method | Limiao Li, Talanta 82(2010)1637-1641                         |
| CPE/NiO                                                                  | 1-110 μM                                                   | AA, UA                                                           | Diluted juice sample                        | Ying Mu, Biosensors and Bioelectronics 26(2011)2948-2952     |
| GC/MWCNT/NiO                                                             | 2.0×10 <sup>-4</sup> mol/L to 1.2 × 10 <sup>-2</sup> mol/L | AA, UA                                                           | Blood human serum sample                    | Shamsipur etal.Bioelectrochemistry 77(2010)120-124           |
| GC/CuO/MWCNT                                                             | Upto 3.0mM                                                 | Dopamine, AA,UA,lactose, Citricacid                              | Blood human serum sample                    | Jiang Yang, Talanta 82(2010)25-33                            |
| Pt/CuO/nafion                                                            | 0.15 μM to 9mM                                             | AA,Dopamine, Glucose Ethanol, L-cysteine                         | --                                          | Xiang –Min, Electroanalytical chemistry 612(2008) 157-163    |
| GCE/β-MnO <sub>2</sub> nanorods                                          | 2.45 μM to 42.85 mM                                        | L-glycine, glucose, L-glutamic acid,AA,UA, L-Ala                 | --                                          | Ai-Jun Wang & Pei-Pei Zhang. Microchim Acta (2011) 175:31–37 |
| GCE/ PPy-Pt hollow spheres nanocomposite.                                | 3.5 μM to 9.9 mM                                           | acetic acid, l-cysteine, AA,glucose, ethanol                     | --                                          | Jingjing Li & Ruo Yuan. Microchim Acta (2010) 171:125–131    |
| GCE/PTBO/ZrO <sub>2</sub> /GCNT/ H <sub>2</sub> O <sub>2</sub>           | 0.05mM to .25mM                                            | --                                                               | Antiseptic solution                         | Int. J. Electrochem. Sci., 6 (2011) 4188 – 420               |
| Hb/ZrO <sub>2</sub> chitosan/GCE/ H <sub>2</sub> O <sub>2</sub>          | 1.5 to 30.2M                                               | --                                                               | --                                          | Biosensors and Bioelectronics 19 (2004) 963–969              |
| Au Electrode/ZrO <sub>2</sub> /Hb – H <sub>2</sub> O <sub>2</sub> sensor | 1.75 μM to 4.9 mM                                          | l-Cysteine Tyrosine Ethanol, Glucose, Acetic acid, Ascorbic acid |                                             | Microchim Acta (2010) 169:181–186                            |
| C@SnO <sub>2</sub> /PtNPs/GCE/ H <sub>2</sub> O <sub>2</sub>             | 1–170 μM                                                   | AA and UA                                                        | milk                                        | Colloids and Surfaces B: Biointerfaces 101 (2013) 106–110    |
| Au–chitosan/HRP/ITO/ H <sub>2</sub> O <sub>2</sub>                       | 0.01 to 0.5 mM                                             | --                                                               | --                                          | Analytical Biochemistry 360 (2007) 288–293                   |
| AuNP arrays/ITO/ H <sub>2</sub> O <sub>2</sub>                           | 1×10 <sup>-6</sup> –5×10 <sup>-4</sup> M                   | --                                                               | --                                          | Analytica Chimica Acta 540 (2005) 299–306                    |

|                                                                  |                                                |               |                     |                                               |
|------------------------------------------------------------------|------------------------------------------------|---------------|---------------------|-----------------------------------------------|
| HRP/nano-Ni-SnO <sub>2</sub> /GCE/ H <sub>2</sub> O <sub>2</sub> | 1.0×10 <sup>-7</sup> to 3.0×10 <sup>-4</sup> M | --            | --                  | Biosensors and Bioelectronics 36 (2012) 41–47 |
| RuO <sub>2</sub> -Nafion-AuNP/GCE/ H <sub>2</sub> O <sub>2</sub> | 0.1nM to 30mM                                  | AA, UA and CA | Antiseptic solution | Present work                                  |
| SnO <sub>2</sub> -Nafion-AuNP/GCE/ H <sub>2</sub> O <sub>2</sub> | 1.3 mM to 39 mM                                | AA, UA and CA | Milk                | Present work                                  |
| ZrO <sub>2</sub> -Nafion-AuNP/GCE/ H <sub>2</sub> O <sub>2</sub> | 1 nm to 1000 mM                                | AA, UA and CA | Milk                | Present work                                  |
